# Supplementary material for: Biorecognition antifouling coatings in complex biological fluids: a review of functionalization aspects
Source: Royal Society of Chemistry journal article supplement (doi:10.1039/d2an00436d), 2022-01-01
Supplement: d2an00436d1.pdf [file d2an00436d1.pdf]

Supplementary material to

## **Biorecognition Antifouling Coatings in Complex Biological Fluids: A Review of Functionalization Aspects**

Ivana Víšová, Milan Houska, Hana Vaisocherová-Lísalová\*

Institute of Physics of the Czech Academy of Sciences, Na Slovance 1999/2, 182 21 Prague 8, Czech Republic

Corresponding Author: Hana Vaisocherová-Lísalová, Ph.D., Institute of Physics, Academy of Sciences of the Czech Republic, Na Slovance 2, 18221 Prague, Czech Republic; Tel.: +420 266 05 29 93, E-mail: [lisalova@fzu.cz](mailto:lisalova@fzu.cz).

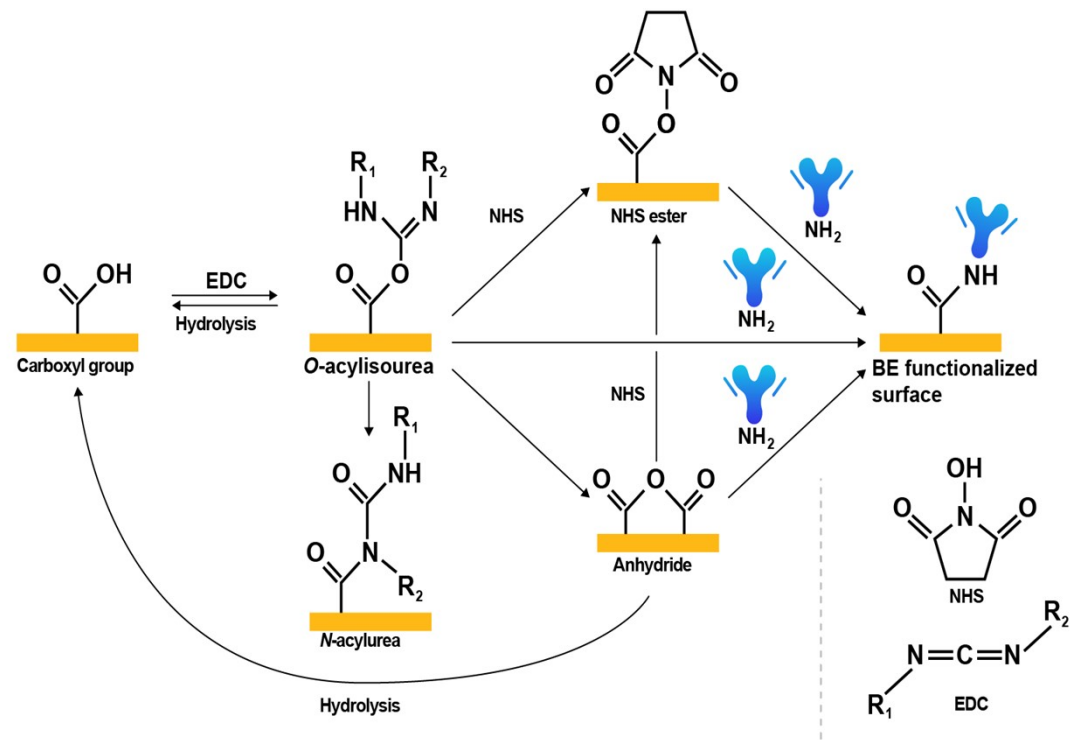

**Figure S1:** Scheme of functionalization reactions using EDC/NHS.

**Table S1:** The effect of functionalization on fouling from bodily fluids for a selection of antifouling (ultra-low and low fouling) platforms relevant for the review

| Platform                                                                                                  | Medium (bodily fluid)    | Exposition time [min] | Fouling before functionalization [ng/cm <sup>2</sup> ] | Method of functionalization | Method of deactivation of residual intermediates (if relevant)                                                          | Biorecognition element             | Fouling after functionalization [ng/cm <sup>2</sup> ] | Probing method | Ref. |
|-----------------------------------------------------------------------------------------------------------|--------------------------|-----------------------|--------------------------------------------------------|-----------------------------|-------------------------------------------------------------------------------------------------------------------------|------------------------------------|-------------------------------------------------------|----------------|------|
| <b>Poly(carboxybetaine) platforms</b>                                                                     |                          |                       |                                                        |                             |                                                                                                                         |                                    |                                                       |                |      |
| pCBAA                                                                                                     | HBP <sup>a)</sup> (100%) | 10                    | 2.73                                                   | EDC/NHS                     | hydrolysis (PBS, pH 7.4, 50min)                                                                                         | anti-Ecoli / anti-Salmonella       | 18.54                                                 | SPR            | 1    |
|                                                                                                           | HBP <sup>a)</sup> (100%) | 7                     | < 0.2 (below LOD)                                      | EDC/NHS                     | hydrolysis (buffer pH 8-9, 21 min)                                                                                      | anti-Salmonella                    | 2.6 ± 1.1                                             | SPR            | 2    |
|                                                                                                           | HBP (50%)                |                       |                                                        |                             |                                                                                                                         |                                    | 1.2 ± 0.4                                             |                |      |
|                                                                                                           | HBP <sup>a)</sup> (100%) | 10                    | ~ 6                                                    | EDC/NHS                     | hydrolysis (10 mM Na <sub>2</sub> CO <sub>3</sub> + 300 mM NaCl, pH 10, 10 min)                                         | anti-TSH<br>anti-ALCAM<br>anti-HCG | ~ 9                                                   | SPRi           | 3    |
|                                                                                                           | HBS <sup>b)</sup> (100%) | 10                    | ~ 0 (below LOD)                                        | EDC/NHS                     | hydrolysis during immobilization                                                                                        | anti-Salmonella                    | ~ 0 (below LOD)                                       | SPR            | 4    |
| Two-layer hierarchical architecture of highly dense layer of pCBAA and second loose layer of pCBAA on top | HBS <sup>b)</sup> (100%) | 10                    | 1.6                                                    | EDC/NHS                     | hydrolysis (10 mM Na <sub>2</sub> CO <sub>3</sub> + 300 mM NaCl, pH 10, 10 min)                                         | anti-TSH antibody                  | 0.5                                                   | SPR            | 5    |
|                                                                                                           | HBP <sup>a)</sup> (100%) | 10                    | < 5                                                    | EDC/NHS                     | hydrolysis (10 mM Na <sub>2</sub> CO <sub>3</sub> + 300 mM NaCl, pH 10, 10 min, followed by 10 mM sodium acetate, pH 5) | anti-TSH antibody                  | < 5                                                   | SPR            | 6    |
| pCBAA hydrogel thin films with carboxybetaine diacrylamide crosslinker                                    | HBS <sup>b)</sup> (100%) | 10                    | 4.7 ± 1.4 (extracted from plot)                        | EDC/NHS                     | hydrolysis followed by possible covalent interaction with GLY                                                           | anti-TSH antibody                  | 5.9 ± 1.7 (extracted from plot)                       | SPR            | 7    |

<sup>a)</sup> Human Blood Plasma; <sup>b)</sup> Human Blood Serum

(Continues)

**Table S1 (Continuation)**

| Platform                              | Medium (bodily fluid)                         | Exposition time [min] | Fouling before functionalization [ng/cm <sup>2</sup> ] | Method of functionalization | Method of deactivation of residual intermediates (if relevant)               | Biorecognition element                        | Fouling after functionalization [ng/cm <sup>2</sup> ] | Probing method | Ref. |
|---------------------------------------|-----------------------------------------------|-----------------------|--------------------------------------------------------|-----------------------------|------------------------------------------------------------------------------|-----------------------------------------------|-------------------------------------------------------|----------------|------|
| <b>Poly(carboxybetaine) platforms</b> |                                               |                       |                                                        |                             |                                                                              |                                               |                                                       |                |      |
| p(CBMAA)                              | HBP <sup>a)</sup> (100%)                      | 10                    | 11.1 ± 2.8                                             | EDC/NHS                     | hydrolysis (10 mM sodium borate + 10 mM imidazole + 10 mM NaCl, pH 8, 30min) | anti-Salmonella                               | 25.4 ± 4.1                                            | SPR            | 8    |
| p(CBMAA 7.5 mol%-co-HPMAA)            |                                               |                       | 0                                                      |                             |                                                                              |                                               | 2.6 ± 1.2                                             |                |      |
| p(CBMAA 15 mol%-co-HPMAA)             | HBP <sup>a)</sup> (100%)                      | 10                    | 2.9 ± 0.8                                              | EDC/NHS                     | hydrolysis (10mM sodium borate buffer +150 mM NaCl+10mM imidazole)           | anti-Salmonella                               | 11.6 ± 2.8                                            | SPR            | 9    |
|                                       | HBP <sup>a)</sup> (100%)                      |                       | 4.9 ± 2.0                                              | EDC/NHS                     | 1M glycine                                                                   | anti-Salmonella<br>NH <sub>2</sub> -ON-probes | 6.6 ± 3.6<br>4.9 ± 2.3                                | SPR            | 8    |
| p(CBMAA 30 mol%-co-HPMAA)             | HBS <sup>b)</sup> (10%)                       | 10                    | 0                                                      | EDC/NHS                     | hydrolysis (PBS, 90 min)                                                     | Hepatitis B surface antigen                   | 0                                                     | SPR            | 10   |
|                                       | SLV10% <sup>c)</sup><br>SLV100% <sup>d)</sup> | 10                    | below LOD<br>below LOD                                 | EDC/NHS                     | hydrolysis (PBS, 90 min)                                                     | Hepatitis B surface antigen<br>not measured   | below LOD<br>not measured                             | SPR            | 11   |
|                                       | HBP <sup>a)</sup> (100%)                      |                       | 10.0 ± 3.5                                             |                             | hydrolysis (10 mM sodium borate + 10mM imidazole + 10mM NaCl, pH 8, 30min)   | anti-Salmonella antibody                      | 23.4 ± 3.9                                            | SPR            | 8    |

<sup>a)</sup> Human Blood Plasma; <sup>b)</sup> Human Blood Serum; <sup>c)</sup> Saliva (10%, supernatant after centrifugation); <sup>d)</sup> Saliva (10%, supernatant after centrifugation)

(Continues)

**Table S1 (Continuation)**

| Platform                                         | Medium (bodily fluid)                   | Exposition time [min] | Fouling before functionalization [ng/cm <sup>2</sup> ] | Method of functionalization | Method of deactivation of residual intermediates (if relevant)       | Biorecognition element               | Fouling after functionalization [ng/cm <sup>2</sup> ] | Probing method                    | Ref. |
|--------------------------------------------------|-----------------------------------------|-----------------------|--------------------------------------------------------|-----------------------------|----------------------------------------------------------------------|--------------------------------------|-------------------------------------------------------|-----------------------------------|------|
| p(SBMAA 3mol%-co-CBMAA 15 mol%-co-HPMAA 82 mol%) | HBP <sup>a)</sup> (100%)                | 10                    | 5.3 ± 1.1                                              | EDC/NHS                     | 1M AEAA                                                              | anti-bacterial antibody              | 10.9 ± 3.2                                            | SPR                               | 12   |
| PEG(3)-Dendrimer carboxybetaine                  | HBP <sup>a)</sup> (10%)                 | 30                    | 2.40                                                   | EDC/NHS                     | blocking with tris(hydroxymethyl)amino methane hydrochloride (0.5 M) | anti-ARG1 N-terminus antibody        | ~175 (extracted from plot)                            | SPRi                              | 13   |
| Catechol <sub>2</sub> -pCBMA <sub>2</sub>        | HBP <sup>a)</sup> (100%)                | 10                    | 8.9 ± 3.4                                              | EDC/NHS                     | hydrolysis (buffer, pH 8-9, 21 min)                                  | anti-ALCAM                           | 9.5 ± 4.1                                             | SPR                               | 14   |
|                                                  | HBS <sup>b)</sup> (100%)                |                       | 11.0 ± 5.0                                             |                             |                                                                      |                                      | NOT SHOWN                                             |                                   |      |
| DOPA <sub>2</sub> -pCBMA <sub>2</sub>            | HBS <sup>b)</sup> (100%)                | 10                    | 11.7 ± 3.0                                             | EDC/NHS                     | hydrolysis (10 mM sodium phosphate + 300 mM NaCl, pH 8.2, 10 min)    | anti-ALCAM                           | 55 (ALCAM naturally occurs in plasma)                 | SPR                               | 15   |
|                                                  | HBP <sup>a)</sup> (100%)                |                       | 6.3 ± 0.9                                              |                             |                                                                      |                                      | not tested                                            |                                   |      |
| DOPA <sub>2</sub> -pCBMA <sub>2</sub>            | FBS <sup>e)</sup> (centrifuge-filtered) | 5                     | ~2 (extracted from plot)                               | EDC/NHS                     | hydrolysis (10 mM borate buffer + 0.75 M NaCl, pH 8.2, 10 min)       | mouse monoclonal anti-ALCAM antibody | ~31 (extracted from plot)                             | Suspended Micro-channel Resonator | 16   |
| DOPA-pCBMA                                       | HBP <sup>a)</sup> (100%)                | 15                    | ~ 11 pm (extracted from plot)                          | EDC/NHS                     | hydrolysis (10 mM HEPES, 300 mM NaCl, pH 8.2)                        | Immunoglobulin control antibodies    | ~54 pm (extracted from plot)                          | Silicon microring resonator       | 17   |
| <b>Platforms with end hydroxyl group</b>         |                                         |                       |                                                        |                             |                                                                      |                                      |                                                       |                                   |      |
| pHEMA                                            | HBP <sup>a)</sup> (100%)                | 10                    | 16.2                                                   | DSC/DMAP in DMF             | ethanolamine                                                         | anti-Ecoli O157 or anti-Salmonella   | 61.7                                                  | SPR                               | 1    |

<sup>a)</sup> Human Blood Plasma; <sup>b)</sup> Human Blood Serum; <sup>e)</sup> Fetal Bovine Serum

(Continues)

Table S1 (Continuation)

| Platform                                                                       | Medium (bodily fluid)    | Exposition time [min] | Fouling before functionalization [ng/cm <sup>2</sup> ] | Method of functionalization | Method of deactivation of residual intermediates (if relevant) | Biorecognition element                                                          | Fouling after functionalization [ng/cm <sup>2</sup> ] | Probing method | Ref. |
|--------------------------------------------------------------------------------|--------------------------|-----------------------|--------------------------------------------------------|-----------------------------|----------------------------------------------------------------|---------------------------------------------------------------------------------|-------------------------------------------------------|----------------|------|
| <b>Platforms with end hydroxyl group</b>                                       |                          |                       |                                                        |                             |                                                                |                                                                                 |                                                       |                |      |
| p(HPMAA)                                                                       | HBP <sup>a)</sup> (100%) | 15                    | < 0.03 (SPR detection limit)                           | DSC/DMAP                    | hydrolysis (PBS, 24 h)                                         | Ab against peptide-glycan-polysaccharide antigen unique to group Gstreptococcus | < 0.03 (SPR detection limit)                          | SPR            | 18   |
| <b>PEG platforms</b>                                                           |                          |                       |                                                        |                             |                                                                |                                                                                 |                                                       |                |      |
| Mixed SAMs of C11-EG6-COOH and C11-EG4-OH                                      | HBP <sup>a)</sup> (100%) | 10                    | 147                                                    | EDC/NHS                     | ethanolamine                                                   | anti-Ecoli O157 or anti-Salmonella                                              | 135                                                   | SPR            | 1    |
|                                                                                |                          |                       | 147                                                    |                             |                                                                | anti-Ecoli O157 or anti-Salmonella, BSA blocked surface                         | 23                                                    |                |      |
| DNA probe and (CH <sub>2</sub> ) <sub>15</sub> -COOH with covalently bound BSA | HBP <sup>a)</sup> (10%)  | 10                    | 5                                                      | DNA hybridization           | none                                                           | anti-ALCAM conjugated with DNA                                                  | 2.9 ± 0.6                                             | SPRi           | 19   |
|                                                                                |                          |                       |                                                        |                             |                                                                | anti-hCG conjugated with DNA probe                                              | 3 ± 1                                                 |                |      |

<sup>a)</sup> Human Blood Plasma

(Continues)

**Table S1** (Continuation)

| Platform                                                                                                              | Medium (bodily fluid)    | Exposition time [min] | Fouling before functionalization [ng/cm <sup>2</sup> ] | Method of functionalization  | Method of deactivation of residual intermediates (if relevant) | Biorecognition element                       | Fouling after functionalization [ng/cm <sup>2</sup> ] | Probing method | Ref. |
|-----------------------------------------------------------------------------------------------------------------------|--------------------------|-----------------------|--------------------------------------------------------|------------------------------|----------------------------------------------------------------|----------------------------------------------|-------------------------------------------------------|----------------|------|
| <b>PEG platforms</b>                                                                                                  |                          |                       |                                                        |                              |                                                                |                                              |                                                       |                |      |
| poly(MeOEGMA-b-GMA) + NaN <sub>3</sub>                                                                                | HBP <sup>a)</sup> (100%) | 15                    | 32 (extracted from plot)                               | catalyst-free SPAAC reaction | none                                                           | biotin conjugated to dibenzocyclooctyne      | 88 (extracted from plot)                              | SPR            | 20   |
| Structured polymer brush p(MeOEGMA-b-GMA) + NaN <sub>3</sub> as antifouling and DBCO-biotin as functionalizable layer |                          |                       | 88 (extracted from plot)                               |                              |                                                                | streptavidin and biotinylated mouse anti-IgG | 25 (extracted from plot)                              |                |      |
| methyl ether methacrylate (MeOEGMA) end-group nucleophilic substitution with azide                                    |                          |                       | 17 (extracted from plot)                               |                              |                                                                | biotin conjugated to dibenzocyclooctyne      | 18 (extracted from plot)                              |                |      |
| poly(MeOEGMA)-DBCO-biotin brush                                                                                       |                          |                       | 18 (extracted from plot)                               |                              |                                                                | streptavidin and biotinylated mouse anti-IgG | 23 (extracted from plot)                              |                |      |

<sup>a)</sup> Human Blood Plasma

(Continues)

**Table S1 (Continuation)**

| Platform                                                                                                                                                                                            | Medium (bodily fluid)                                | Exposition time [min] | Fouling before functionalization [ng/cm <sup>2</sup> ]             | Method of functionalization | Method of deactivation of residual intermediates (if relevant) | Biorecognition element                    | Fouling after functionalization [ng/cm <sup>2</sup> ]                | Probing method | Ref. |
|-----------------------------------------------------------------------------------------------------------------------------------------------------------------------------------------------------|------------------------------------------------------|-----------------------|--------------------------------------------------------------------|-----------------------------|----------------------------------------------------------------|-------------------------------------------|----------------------------------------------------------------------|----------------|------|
| DNA tetrahedron probes                                                                                                                                                                              | cell lysate (100%)                                   | 30                    | N/A (platform itself s functional)                                 | none                        | none                                                           | DNA-probe                                 | 0                                                                    | SPR            | 21   |
|                                                                                                                                                                                                     | WB <sup>h</sup> (5%)                                 |                       |                                                                    |                             |                                                                |                                           | 0                                                                    |                |      |
|                                                                                                                                                                                                     | red cells (9.85e8 CFU/mL)                            |                       |                                                                    |                             |                                                                |                                           | 5.6 ± 1.4                                                            |                |      |
|                                                                                                                                                                                                     | HBP <sup>a)</sup> (100%)                             |                       |                                                                    |                             |                                                                |                                           | 8.0 ± 2.1                                                            |                |      |
|                                                                                                                                                                                                     | HBS <sup>b)</sup> (100%)                             |                       |                                                                    |                             |                                                                |                                           | 7.7 ± 1.2                                                            |                |      |
| ssDNA surface passivated by mercaptohexanol                                                                                                                                                         | HBP <sup>a)</sup> (100%)                             | 30                    | N/A (platform itself s functional)                                 | none                        | none                                                           | DNA-probe                                 | 41.5 ± 4.0                                                           |                |      |
|                                                                                                                                                                                                     | HBS <sup>b)</sup> (100%)                             |                       |                                                                    |                             |                                                                |                                           | 68.2 ± 7.5                                                           |                |      |
| Ionic liquid SAM (1-(carboxymethyl)-3-(mercaptododecyl)-imidazoliumbromide)                                                                                                                         | HBS <sup>b)</sup> (100%)                             | not defined           | 99                                                                 | NHS/EDC                     | EA                                                             | anti-human IgG antibody                   | 45                                                                   | SPR            | 22   |
| Biotynylated poly(acrylic acid)-(ethylene oxide) <sub>n</sub> monolayer adsorbed on top of multilayer poly(ethylene imine)-[(poly(styrene sulfonate)/poly(allylamine hydrochloride)) <sub>3</sub> ] | FBS <sup>e)</sup> (10%)                              | 10                    | < 1                                                                | none                        | none                                                           | streptavidin - biotinylated antiovalbumin | <1                                                                   | QCM            | 23   |
| 1-(carboxyethyl)-3-(12-mercaptododecyl)-1H-imidazolium bromide [(HS) <sup>12</sup> C <sub>12</sub> (COOH) <sup>5</sup> C <sub>5</sub> im] <sup>+</sup> Br <sup>-</sup> ionic liquid                 | Breast cancer cell lysates - MCF-7 and SK-BR-3 (50%) | 20                    | Irreversible fouling 191 ± 45, real time nonspecific fouling 6 ± 4 | NHS                         | cell lysate                                                    | polyclonal rabbit anti-HER2               | Irreversible fouling not shown, real time nonspecific fouling 61 ± 8 | SPR            | 24   |

<sup>a)</sup> Human Blood Plasma; <sup>b)</sup> Human Blood Serum; <sup>e)</sup> Fetal Bovine Serum; <sup>h)</sup> Whole Blood

(Continues)



**Table S1 (Continuation)**

| Platform                                                                                                                                               | Medium (bodily fluid)    | Exposition time [min] | Fouling before functionalization [ng/cm <sup>2</sup> ] | Method of functionalization | Method of deactivation of residual intermediates (if relevant) | Biorecognition element                                                | Fouling after functionalization [ng/cm <sup>2</sup> ]           | Probing method | Ref. |
|--------------------------------------------------------------------------------------------------------------------------------------------------------|--------------------------|-----------------------|--------------------------------------------------------|-----------------------------|----------------------------------------------------------------|-----------------------------------------------------------------------|-----------------------------------------------------------------|----------------|------|
| IgG-molecular imprinted hydrogel based on acrylamide, methylene N,N' bis (acrylamide) and N-isopropylacrylamide crosslinked monomers                   | FBS <sup>e)</sup> (50%)  | 30                    | Data not shown for FBS <sup>e)</sup> (50%)             | Imprinted hydrogel          | none                                                           | Cavity for IgG detection                                              | Charge-transfer resistance change of 2.063%                     | EIS            | 25   |
| peptide<br>CPPPPNQNQNQNQDHWRGWV<br>A mixed with CPPP-<br>PNQNQNQNQ                                                                                     | FBS <sup>e)</sup> (100%) | 30                    | N/A (platform itself s functional)                     | none                        | none                                                           | last part of peptide HWRGWVA selectively binds Fc region of human IgG | Signal suppression ~1%                                          | DPV            | 26   |
| peptide<br>CPPPPNQNQNQNQDHWRGWV<br>A mixed with CPPP-<br>PNQNQNQNQ                                                                                     | FBS <sup>e)</sup> (100%) | 180                   | N/A (platform itself s functional)                     | non                         | none                                                           | last part of peptide HWRGWVA selectively binds Fc region of human IgG | Signal suppression of ~11%                                      | DPV            | 26   |
| Mixed SAM from peptide EKEKEKE-PPPPC, ATP binding aptamer 5'-SH-(CH <sub>2</sub> ) <sub>6</sub> -ACCTGGGGGAGTATTGCGGAGG AAGGT-3' and 6-mercaptohexanol | HBP <sup>a)</sup> (10%)  | not defined           | N/A (platform itself s functional)                     | none                        | none                                                           | SH-aptamer self-assembled with antifouling peptide                    | Charge-transfer resistance change of ~10% (extracted from plot) | EIS            | 27   |
| Mixed SAM from PEG, ATP binding aptamer 5'-SH-(CH <sub>2</sub> ) <sub>6</sub> -ACCTGGGGGAGTATTGCGGAGG AAGGT-3' and 6-mercaptohexanol                   | HBP <sup>a)</sup> (10%)  | not defined           | N/A (platform itself s functional)                     | none                        | none                                                           | SH-aptamer simultaneously self-assembled with thiolated PEG           | Charge-transfer resistance change of ~64 (extracted from plot)  | EIS            | 28   |

a) Human Blood Plasma; e) Fetal Bovine Serum

**Table S2:** The effect of functionalization on fouling from foodstuff for a selection of antifouling (ultra-low and low fouling) platforms relevant for the review.

| Platform                              | Medium (foodstuff)    | Exposition time [min] | Fouling before functionalization [ng/cm <sup>2</sup> ] | Method of functionalization | Method of deactivation of residual intermediates (if relevant)         | Biorecognition element       | Fouling after functionalization [ng/cm <sup>2</sup> ] | Probing method | Ref. |
|---------------------------------------|-----------------------|-----------------------|--------------------------------------------------------|-----------------------------|------------------------------------------------------------------------|------------------------------|-------------------------------------------------------|----------------|------|
| <b>Poly(carboxybetaine) platforms</b> |                       |                       |                                                        |                             |                                                                        |                              |                                                       |                |      |
| pCBAA                                 | milk (100%)           | 10min                 | 0.83                                                   | EDC/NHS                     | hydrolysis (PBS, pH 7.4, 50min)                                        | anti-Salmonella              | 1.81                                                  | SPR            | 1    |
|                                       | milk (100%)           | 10                    | 0.2                                                    | EDC/NHS                     | hydrolysis (10 mM sodium borate buffer +150 mM NaCl+10 mM imidazole)   | anti-Salmonella              | 4.1                                                   | SPR            | 9    |
|                                       | spinach (10%)         |                       | 2.8                                                    |                             |                                                                        |                              | 16.8                                                  |                |      |
|                                       | cucumber (10%)        |                       | 0.25                                                   |                             |                                                                        |                              | 8.1                                                   |                |      |
|                                       | hamburger (10%)       |                       | 0                                                      |                             |                                                                        |                              | 2.2                                                   |                |      |
|                                       | lettuce (10%)         |                       | 0.14                                                   |                             |                                                                        |                              | 4.3                                                   |                |      |
|                                       | cucumber (10%)        | 15                    | <0.2 (below LOD)                                       | EDC/NHS                     | hydrolysis (PBS, pH 10)                                                | anti-Ecoli                   | 6.2 ± 1.7                                             | SPR            | 29   |
|                                       | hamburger (10%)       |                       |                                                        |                             |                                                                        |                              | 3.4 ± 1.3                                             |                |      |
|                                       | orange extract (100%) | 10                    | 1.45                                                   | EDC/NHS                     | hydrolysis (PBS pH 7.4, 50 min)                                        | anti-Ecoli / anti-Salmonella | 1.4                                                   | SPR            | 1    |
|                                       | tomato extract (100%) |                       | 1.05                                                   |                             |                                                                        |                              | 0.06                                                  |                |      |
| cucumber extract (100%)               | 1.8                   |                       | 3.09                                                   |                             |                                                                        |                              |                                                       |                |      |
| p(CBMAA)                              | milk (100%)           | 10                    | 0.6                                                    | EDC/NHS                     | hydrolysis (10 mM sodium borate buffer +150 mM NaCl + 10 mM imidazole) | anti-Salmonella              | 20.4                                                  | SPR            | 9    |
|                                       | spinach (10%)         |                       | 2.74                                                   |                             |                                                                        |                              | 12.2                                                  |                |      |
|                                       | cucumber (10%)        |                       | 2.1                                                    |                             |                                                                        |                              | 3.4                                                   |                |      |
|                                       | hamburger (10%)       |                       | 2.2                                                    |                             |                                                                        |                              | 4.5                                                   |                |      |
|                                       | lettuce (10%)         |                       | 2.4                                                    |                             |                                                                        |                              | 4.9                                                   |                |      |

(Continues)

Table S2 (Continuation)

| Platform                              | Medium (foodstuff) | Exposition time [min] | Fouling before functionalization [ng/cm <sup>2</sup> ] | Method of functionalization | Method of deactivation of residual intermediates (if relevant)         | Biorecognition element | Fouling after functionalization [ng/cm <sup>2</sup> ] | Probing method | Ref. |
|---------------------------------------|--------------------|-----------------------|--------------------------------------------------------|-----------------------------|------------------------------------------------------------------------|------------------------|-------------------------------------------------------|----------------|------|
| <b>Poly(carboxybetaine) platforms</b> |                    |                       |                                                        |                             |                                                                        |                        |                                                       |                |      |
| p(CBMAA 7.5 mol%-co-HPMAA)            | milk (100%)        | 10                    | 0                                                      | EDC/NHS                     | hydrolysis (10 mM sodium borate buffer +150 mM NaCl + 10 mM imidazole) | anti-Salmonella        | 0.6                                                   | SPR            | 9    |
|                                       | spinach (10%)      |                       | 0                                                      |                             |                                                                        |                        | 1.1                                                   |                |      |
|                                       | cucumber (10%)     |                       | 0                                                      |                             |                                                                        |                        | 0                                                     |                |      |
|                                       | hamburger (10%)    |                       | 0                                                      |                             |                                                                        |                        | 0                                                     |                |      |
|                                       | lettuce (10%)      |                       | 0                                                      |                             |                                                                        |                        | 0                                                     |                |      |
| p(CBMAA 15 mol%-co-HPMAA)             | milk (100%)        |                       | 0                                                      |                             |                                                                        |                        | 1.7                                                   |                |      |
|                                       | spinach (10%)      |                       | 0.5                                                    |                             |                                                                        |                        | 3.4                                                   |                |      |
|                                       | cucumber (10%)     |                       | 0.3                                                    |                             |                                                                        |                        | 0.05                                                  |                |      |
|                                       | hamburger (10%)    |                       | 0                                                      |                             |                                                                        |                        | 0                                                     |                |      |
|                                       | lettuce (10%)      |                       | 0.2                                                    |                             |                                                                        |                        | 0                                                     |                |      |
| p(CBMAA 30 mol%-co-HPMAA)             | milk (100%)        |                       | 0                                                      |                             |                                                                        |                        | 6.8                                                   |                |      |
|                                       | spinach (10%)      |                       | 1.2                                                    |                             |                                                                        |                        | 4.2                                                   |                |      |
|                                       | cucumber (10%)     |                       | 1.4                                                    |                             |                                                                        |                        | 2.8                                                   |                |      |
|                                       | hamburger (10%)    |                       | 0                                                      |                             |                                                                        |                        | 2.5                                                   |                |      |
|                                       | lettuce (10%)      |                       | 1.4                                                    |                             |                                                                        |                        | 3.5                                                   |                |      |

(Continues)

**Table S2 (Continuation)**

| Platform                                 | Medium (foodstuff)                            | Exposition time [min] | Fouling before functionalization [ng/cm <sup>2</sup> ] | Method of functionalization | Method of deactivation of residual intermediates (if relevant) | Biorecognition element                    | Fouling after functionalization [ng/cm <sup>2</sup> ] | Probing method | Ref. |
|------------------------------------------|-----------------------------------------------|-----------------------|--------------------------------------------------------|-----------------------------|----------------------------------------------------------------|-------------------------------------------|-------------------------------------------------------|----------------|------|
| <b>Platforms with end hydroxyl group</b> |                                               |                       |                                                        |                             |                                                                |                                           |                                                       |                |      |
| pHEMA                                    | orange (100%)                                 | 10                    | 1.6                                                    | DSC/DMAP in DMF             | EA                                                             | anti-Ecoli O157 or anti-Salmonella        | 10.5                                                  | SPR            | 1    |
|                                          | tomato (100%)                                 |                       | 2.6                                                    |                             |                                                                |                                           | 14.5                                                  |                |      |
|                                          | cucumber (100%)                               |                       | 5.3                                                    |                             |                                                                |                                           | 26.7                                                  |                |      |
|                                          | milk (100%)                                   |                       | 5.7                                                    |                             |                                                                |                                           | 23.6                                                  |                |      |
|                                          | fresh-whole fat milk (100%)                   | 30                    | ~0                                                     | DSC/DMAP in DMF             | hydrolysis (PBS, pH 7.4, 24h)                                  | anti-Cronobacter (ex situ immobilization) | ~0                                                    | SPR            | 30   |
|                                          | whole-fat milk from powder (Laktino) (10%)    |                       | ~0                                                     |                             |                                                                |                                           | ~0                                                    |                |      |
|                                          | infant formulation from powder (Sunar™) (10%) |                       | ~0                                                     |                             |                                                                |                                           | ~0                                                    |                |      |

(Continues)

**Table S2 (Continuation)**

| Platform                                 | Medium (foodstuff)                                 | Exposition time [min] | Fouling before functionalization [ng/cm <sup>2</sup> ] | Method of functionalization | Method of deactivation of residual intermediates (if relevant) | Biorecognition element                                  | Fouling after functionalization [ng/cm <sup>2</sup> ] | Probing method | Ref. |
|------------------------------------------|----------------------------------------------------|-----------------------|--------------------------------------------------------|-----------------------------|----------------------------------------------------------------|---------------------------------------------------------|-------------------------------------------------------|----------------|------|
| <b>PEG platforms</b>                     |                                                    |                       |                                                        |                             |                                                                |                                                         |                                                       |                |      |
| Mix of HS-C11-EG6-COOH and HS-C11-EG4-OH | orange (100%)                                      | 10                    | 21.12                                                  | EDC/NHS                     | ethanolamine                                                   | anti-Ecoli O157 or anti-Salmonella                      | 2.6                                                   | SPR            | 1    |
|                                          | tomato (100%)                                      |                       | 9.13                                                   |                             |                                                                |                                                         | 7.51                                                  |                |      |
|                                          | cucumber (100%)                                    |                       | 51.9                                                   |                             |                                                                |                                                         | 18.52                                                 |                |      |
|                                          | milk (100%)                                        |                       | 154.25                                                 |                             |                                                                |                                                         | 6.88                                                  |                |      |
|                                          | orange (100%)                                      |                       | 21.12                                                  |                             |                                                                | anti-Ecoli O157 or anti-Salmonella. BSA blocked surface | 2.28                                                  |                |      |
|                                          | tomato (100%)                                      |                       | 9.13                                                   |                             |                                                                |                                                         | 2.64                                                  |                |      |
|                                          | cucumber (100%)                                    |                       | 51.9                                                   |                             |                                                                |                                                         | 4.4                                                   |                |      |
|                                          | milk (100%)                                        |                       | 154.25                                                 |                             |                                                                |                                                         | 6.24                                                  |                |      |
| <b>Other platforms</b>                   |                                                    |                       |                                                        |                             |                                                                |                                                         |                                                       |                |      |
| Hyaluronic acid-grafted Au               | soybean milk (10mg/mL. centrifuge-filtered 0.22um) | 10                    | 0.6                                                    | EDC/NHS                     | 1M ethanolamine                                                | anti-BSA                                                | 0.67                                                  | SPR            | 31   |
|                                          | cow milk (100%. centrifuge-filtered 0.22um)        |                       | 9.8                                                    |                             |                                                                |                                                         | 17                                                    |                |      |

## References

1. H. Vaisocherova, V. Sevcu, P. Adam, B. Spackova, K. Hegnerova, A. D. Pereira, C. Rodriguez-Emmenegger, T. Riedel, M. Houska, E. Brynda and J. Homola, *Biosensors & bioelectronics*, 2014, **51**, 150-157.
2. H. Vaisocherova, W. Yang, Z. Zhang, Z. Cao, G. Cheng, M. Piliarik, J. Homola and S. Jiang, *Analytical Chemistry*, 2008, **80**, 7894-7901.
3. N. D. Brault, A. D. White, A. D. Taylor, Q. Yu and S. Jiang, *Analytical Chemistry*, 2013, **85**, 1447-1453.
4. W. Yang, H. Xue, W. Li, J. Zhang and S. Jiang, *Langmuir*, 2009, **25**, 11911-11916.
5. N. D. Brault, H. S. Sundaram, C.-J. Huang, Y. Li, Q. Yu and S. Jiang, *Biomacromolecules*, 2012, **13**, 4049-4056.
6. C.-J. Huang, Y. Li and S. Jiang, *Analytical Chemistry*, 2012, **84**, 3440-3445.
7. Y. N. Chou, F. Sun, H. C. Hung, P. Jain, A. Sinclair, P. Zhang, T. Bai, Y. Chang, T. C. Wen, Q. M. Yu and S. Y. Jiang, *Acta Biomaterialia*, 2016, **40**, 31-37.
8. H. Lísalová, E. Brynda, M. Houska, I. Víšová, K. Mrkvová, X. C. Song, E. Gedeonová, F. Surman, T. Riedel, O. Pop-Georgievski and J. Homola, *Analytical Chemistry*, 2017, **89**, 3524-3531.
9. H. Vaisocherová-Lísalová, F. Surman, I. Víšová, M. Vala, T. Špringer, M. L. Ermini, H. Šířpová, P. Šedivák, M. Houska, T. Riedel, O. Pop-Georgievski, E. Brynda and J. Homola, *Analytical Chemistry*, 2016, **88**, 10533-10539.
10. T. Riedel, F. Surman, S. Hageneder, O. Pop-Georgievski, C. Noehammer, M. Hofner, E. Brynda, C. Rodriguez-Emmenegger and J. Dostálek, *Biosensors and Bioelectronics*, 2016, **85**, 272-279.
11. T. Riedel, S. Hageneder, F. Surman, O. Pop-Georgievski, C. Noehammer, M. Hofner, E. Brynda, C. Rodriguez-Emmenegger and J. Dostálek, *Analytical Chemistry*, 2017, **89**, 2972-2977.
12. M. Forinová, A. Pilipenco, I. Víšová, N. S. Lynn, J. Dostálek, H. Mašková, V. Hönig, M. Palus, M. Selinger, P. Kočová, F. Dyčka, J. Štěřba, M. Houska, M. Vrabcová, P. Horák, J. Anthi, C.-P. Tung, C.-M. Yu, C.-Y. Chen, Y.-C. Huang, P.-H. Tsai, S.-Y. Lin, H.-J. Hsu, A.-S. Yang, A. Dejneka and H. Vaisocherová-Lísalová, *ACS applied materials & interfaces*, 2021, **13**, 60612-60624.
13. R. D'Agata, N. Bellassai, M. C. Giuffrida, A. M. Aura, C. Petri, P. Kögler, G. Vecchio, U. Jonas and G. Spoto, *Talanta*, 2021, **221**, 121483.
14. C. Gao, G. Li, H. Xue, W. Yang, F. Zhang and S. Jiang, *Biomaterials*, 2010, **31**, 1486-1492.
15. N. D. Brault, C. Gao, H. Xue, M. Piliarik, J. Homola, S. Jiang and Q. Yu, *Biosensors and Bioelectronics*, 2010, **25**, 2276-2282.
16. M. G. von Muhlen, N. D. Brault, S. M. Knudsen, S. Jiang and S. R. Manalis, *Analytical Chemistry*, 2010, **82**, 1905-1910.
17. J. T. Kirk, N. D. Brault, T. Baehr-Jones, M. Hochberg, S. Jiang and D. M. Ratner, *Biosensors & bioelectronics*, 2013, **42**, 100-105.
18. C. Rodriguez-Emmenegger, E. Brynda, T. Riedel, M. Houska, V. Šubr, A. Bologna Alles, E. Hasan, J. E. Gautrot and W. T. S. Huck, *Macromolecular Rapid Communications*, 2011, **32**, 952-957.
19. M. Piliarik, M. Bocková and J. Homola, *Biosensors and Bioelectronics*, 2010, **26**, 1656-1661.
20. V. Parrillo, A. de los Santos Pereira, T. Riedel and C. Rodriguez-Emmenegger, *Analytica Chimica Acta*, 2017, **971**, 78-87.
21. W. Nie, Q. Wang, L. Zou, Y. Zheng, X. Liu, X. Yang and K. Wang, *Analytical Chemistry*, 2018, DOI: 10.1021/acs.analchem.8b02686.
22. M. Ratel, A. Provencher-Girard, S. S. Zhao, J. Breault-Turcot, J. Labrecque-Carbonneau, M. Branca, J. N. Pelletier, A. R. Schmitzer and J.-F. Masson, *Analytical Chemistry*, 2013, **85**, 5770-5777.
23. J. Davila, D. Toulemon, T. Garnier, A. Garnier, B. Senger, J.-C. Voegel, P. J. Mésini, P. Schaaf, F. Boulmedais and L. Jierry, *Langmuir*, 2013, **29**, 7488-7498.

24. A. Aubé, S. Campbell, A. R. Schmitzer, A. Claing and J.-F. Masson, *Analyst*, 2017, **142**, 2343-2353.
25. M. Cui, Y. H. Gong, M. G. Du, K. Wang, T. D. Li, X. L. Zhu, S. Wang and X. L. Luo, *Sens. Actuator B-Chem.*, 2021, **337**, 9.
26. N. Liu, N. Hui, J. J. Davis and X. Luo, *ACS sensors*, 2018, DOI: 10.1021/acssensors.8b00318.
27. G. Wang, X. Su, Q. Xu, G. Xu, J. Lin and X. Luo, *Biosensors and Bioelectronics*, 2018, **101**, 129-134.
28. G. Wang, Q. Xu, L. Liu, X. Su, J. Lin, G. Xu and X. Luo, *ACS applied materials & interfaces*, 2017, **9**, 31153-31160.
29. H. Vaisocherová-Lísalová, I. Víšová, M. L. Ermini, T. Špringer, X. C. Song, J. Mrázek, J. Lamačová, N. Scott Lynn, P. Šedivák and J. Homola, *Biosensors and Bioelectronics*, 2016, **80**, 84-90.
30. C. Rodriguez-Emmenegger, O. A. Avramenko, E. Brynda, J. Skvor and A. Bologna Alles, *Biosensors and Bioelectronics*, 2011, **26**, 4545-4551.
31. X. Liu, R. Huang, R. Su, W. Qi, L. Wang and Z. He, *ACS applied materials & interfaces*, 2014, **6**, 13034-13042.
